# Supplementary material
Source: publisher figshare collection journal article supplement (https://acs.figshare.com/ndownloader/files/24149470)
Supplement: Supplementary file 1 [file 24149470]

## SUPPORTING INFORMATION

**Sophorolipid butyl ester: an antimicrobial stabilizer of essential oil-based emulsions and interactions with chitosan and  $\gamma$ -poly(glutamic acid)**

*Xue Wang,<sup>†,‡</sup> Raymond J. Lin,<sup>†,‡</sup> Richard A. Gross\*,<sup>†,‡</sup>*

<sup>†</sup>New York State Center for Polymer Synthesis, Department of Chemistry and Chemical Biology, Rensselaer Polytechnic Institute, 110 8th Street, Troy, New York 12180, United States

<sup>‡</sup>Center for Biotechnology and Interdisciplinary Studies, Department of Biological Sciences, Rensselaer Polytechnic Institute, 1623 15th Street, Troy, New York 12180, United States

CORRESPONDING AUTHOR: Richard A. Gross;

Email: [grossr@rpi.edu](mailto:grossr@rpi.edu),

Phone: +01 518 276 3734

### **Natural sophorolipids (SLs) production via fermentation**

SLs were prepared by fermentation of *Starmerella bombicola* using 40 g of high oleic acid sunflower oil, 100 g of glucose, 10 g of yeast extract, and 1 g of urea for 1 L of water following a literature procedure.<sup>1</sup> The crude SLs were extracted with ethyl acetate from the fermentation broth and the solvent was removed by rotary-evaporation under vacuum. The crude product, a mixture of oil and SLs, was dissolved in ethyl acetate at 77 °C and then an equal volume of hexane was added. The hexane/ethyl acetate solution was kept at -20°C for overnight until lactonic SLs (white precipitates) were obtained. The precipitate was then filtered and dried. This was repeated until all oil had been removed. Analysis of the final mixture by LC–MS following a literature procedure showed that the major component (approx. 95 mol%) is di-acetylated LSL.<sup>2</sup>

## Synthesis of SLBE

The synthesis of SLBE was performed via ring-opening transesterification under alkaline conditions. LSLs (10 g) was dissolved in 15 mL 1-butanol at 100 °C. Sodium (0.15 g) was reacted with 5 mL 1-butanol for 1 h to prepare sodium butyrate. The LSLs/butanol solution was treated with sodium butyrate at 100 °C for 4 h under N<sub>2</sub> atmosphere. Reaction progress was tracked by silica thin layer chromatography using CHCl<sub>3</sub>/CH<sub>3</sub>OH (8:2 v/v) as the eluent. Upon completion, the reaction mixture was acidified to pH 4 with 3M HCl and solvent was removed by rotary-evaporation under vacuum. The crude product (brown solid) was dissolved in of boiling ethanol (15 mL) to which 100 mL iced water was added. The ethanol/water solution was kept at -20 °C overnight until a white precipitate was obtained. The precipitate was then filtered and lyophilized. Further purification was performed by flash chromatography with an automated Biotage SP system (Charlotte, NC, USA) fitted with a 100 g Biotage silica SNAP column. The eluent was CHCl<sub>3</sub>/CH<sub>3</sub>OH with a gradient from 95% to 60% CHCl<sub>3</sub> over 2376 mL total volume. The final purified SLBE product was obtained in 60% yield as a white solid (melting point 140 °C). Structure analysis of SLBE was performed by LC-MS, <sup>1</sup>H NMR, and <sup>13</sup>C NMR. Results of these analyses when compared to spectra of closely related SL-esters confirmed that SLBE was obtained in high purity (> 98%).<sup>3,4</sup>

## Lipid phase viscosity

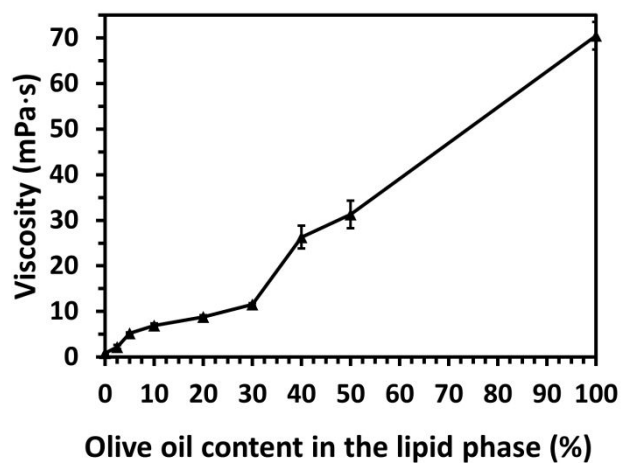

**Figure S1.** Lipid phase viscosity at different olive oil content. At 0%, the lipid phase contains pure oregano oil, whereas, at 100%, the lipid phase consists of pure olive oil.

**Table S1.** Values of lipid phase viscosity at different olive oil content

| Olive oil content | Viscosity (mPa·s) |
|-------------------|-------------------|
| 0 %               | 0.9 ± 0.2         |
| 2.5 %             | 2.2 ± 0.5         |
| 5 %               | 5.2 ± 0.2         |
| 10 %              | 6.9 ± 0.5         |
| 20 %              | 8.8 ± 0.38        |
| 30 %              | 11.5 ± 0.37       |
| 40 %              | 26.3 ± 2.5        |

|       |              |
|-------|--------------|
| 50 %  | $31.3 \pm 3$ |
| 100 % | $70.5 \pm 3$ |

---

### Viscosity of $\gamma$ -PGA/CH emulsions

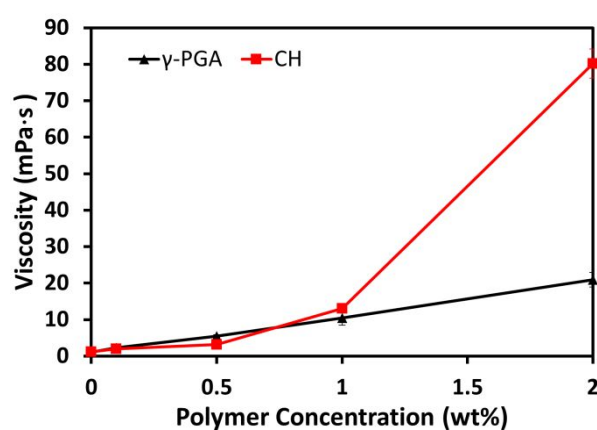

**Figure S2.** Emulsion viscosity as a function of polymer concentration. Emulsions were prepared with acetate buffer (10 mM for  $\gamma$ -PGA emulsions and 100 mM for CH emulsions, pH 3.6) at 0.5 wt% SLBE and 5wt% oregano/olive oil (4:1 w/w). All measurements were taken at 25 °C.

### References

1. Guilmanov, V; Ballistrari, A; Impallomeni, G; Gross, R, Oxygen transfer rate and sophorose lipid production by *Candida bombicola*. *Biotechnol. Bioeng.* **2002**, 5, 489–494.

2. Gao, W; Hagver, R; Shah, V; Xie, W; Gross, R; Ilker, M; Bell, C; Burke, K; Coughlin, E, Glycolipid polymer synthesized from natural lactonic sophorolipids by ring-opening metathesis polymerization. *Macromolecules* **2007**, *40*, 145–147.
3. Koh, A; Linhardt, R.; Gross, R. Effect of sophorolipid n-alkyl ester chain length on its interfacial properties at the almond oil-water interface. *Langmuir* **2016**, *32*, 5562–5572.
4. Koh, A; Gross, R. Molecular editing of sophorolipids by esterification of lipid moieties: Effects on interfacial properties at paraffin and synthetic crude oil-water interfaces. *Colloids and Surfaces, A: Physicochemical and Engineering Aspects* **2016**, *507*, 170-181.
